# Supplementary material for: MOF-directed templating synthesis of a porous multicomponent dodecahedron with hollow interiors for enhanced lithium-ion battery anodes
Source: Royal Society of Chemistry journal article supplement (doi:10.1039/c5ta00455a), 2015-01-01
Supplement: c5ta00455a1.pdf [file c5ta00455a1.pdf]

Supporting Information

## MOF-directed templating synthesis of porous multicomponent dodecahedron with hollow interiors for enhanced lithium-ion battery anodes

Chencheng Sun,<sup>a</sup> Jun Yang,<sup>a</sup> Xianhong Rui,<sup>b</sup> Weina Zhang,<sup>b</sup> Qingyu Yan,<sup>b</sup> Peng Chen,<sup>c</sup> Fengwei Huo,<sup>\*a</sup> Wei Huang,<sup>\*a</sup> and Xiaochen Dong<sup>\*a</sup>

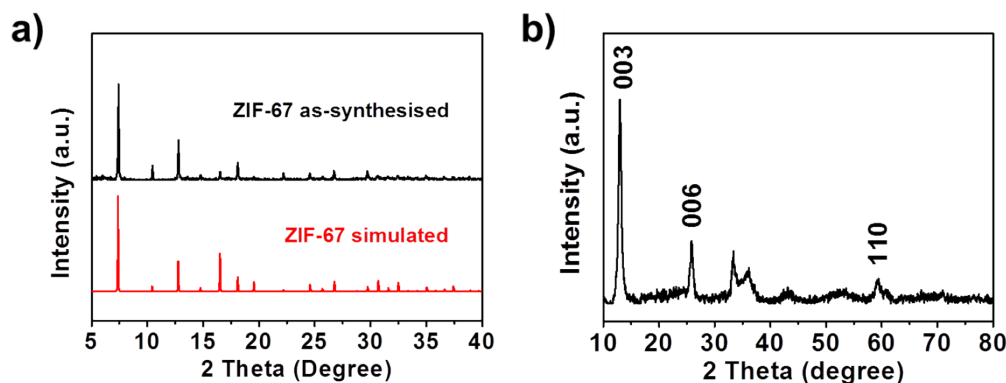

**Figure S1.** XRD patterns of the ZIF-67 powder (a) before and (b) after solvothermal treatment with 150 mg Ni(NO<sub>3</sub>)<sub>2</sub>.

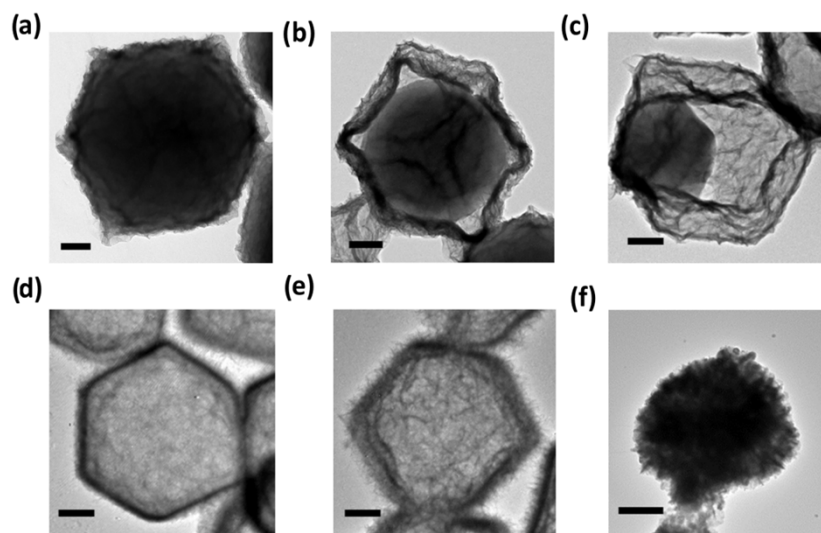

**Figure S2.** TEM images of the products obtained with different amount of  $\text{Ni}(\text{NO}_3)_2$  at absolute ethanol for 1 h (a) 25 mg, (b) 50 mg, (c) 75 mg, (d) 100 mg, (e) 150 mg, (f) 500 mg, respectively. (all of the scale bars are 200 nm).

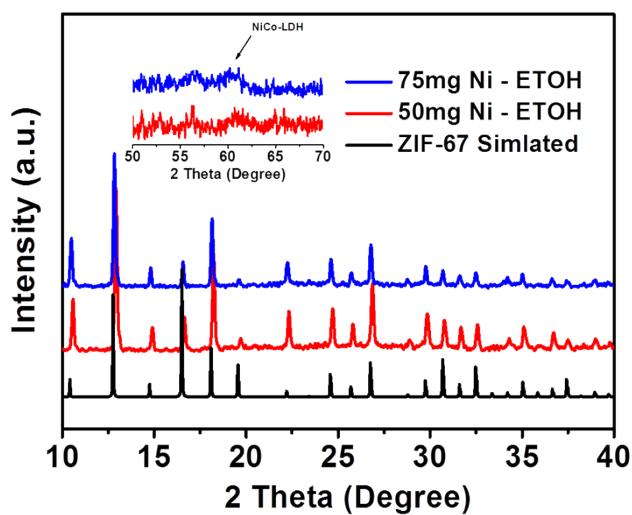

**Figure S3.** XRD patterns of the products obtained with 50 mg and 75 mg  $\text{Ni}(\text{NO}_3)_2$  at absolute ethanol for 1 h.

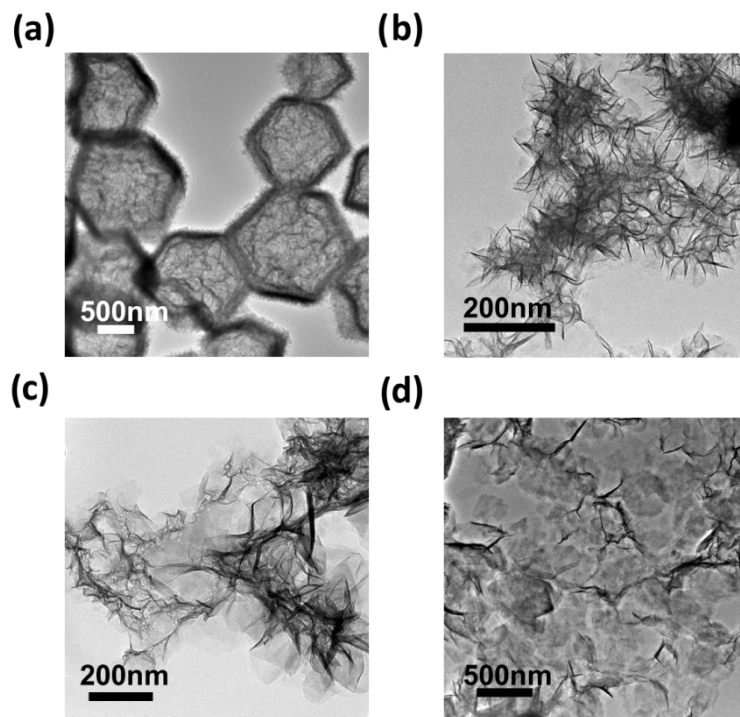

**Figure S4.** TEM images of the products obtained with different content of DI water in solvent at 90°C for 1 h (a) 0, (b) 25%, (c) 50%, (d) 100%.

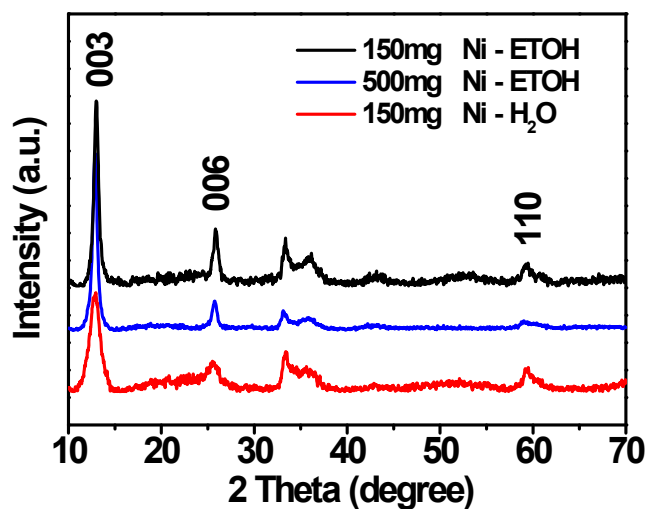

**Figure S5.** XRD patterns of the products obtained with various conditions. 150 mg  $\text{Ni}(\text{NO}_3)_2$  at absolute ethanol (Black). 500 mg  $\text{Ni}(\text{NO}_3)_2$  at absolute ethanol (Blue). 150 mg  $\text{Ni}(\text{NO}_3)_2$  at DI water (Red).

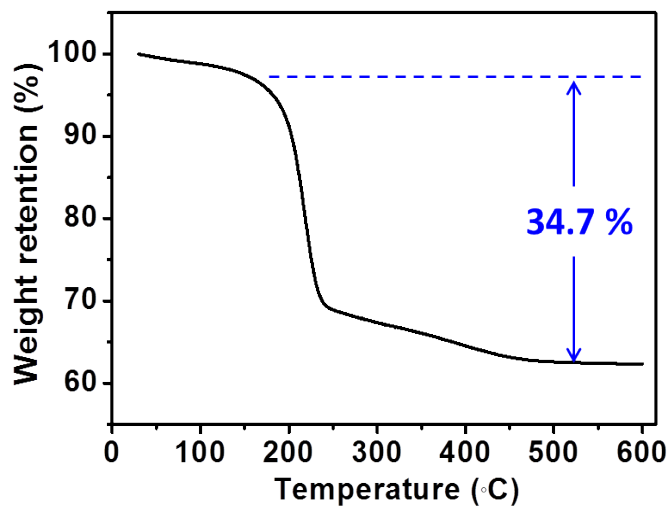

Figure S6. TGA curve of NiCo-LDH-HD obtained in the air flow at a heating rate of  $2\text{ }^{\circ}\text{C min}^{-1}$ .

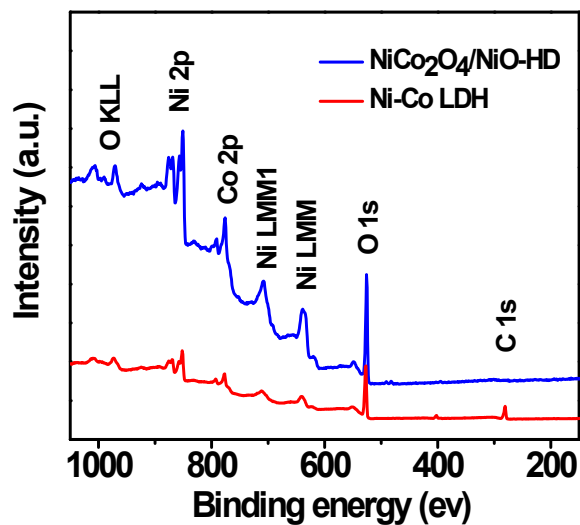

Figure S7. Survey XPS Spectra of NiCo-LDH-HD before and after calcination in air for 1h.

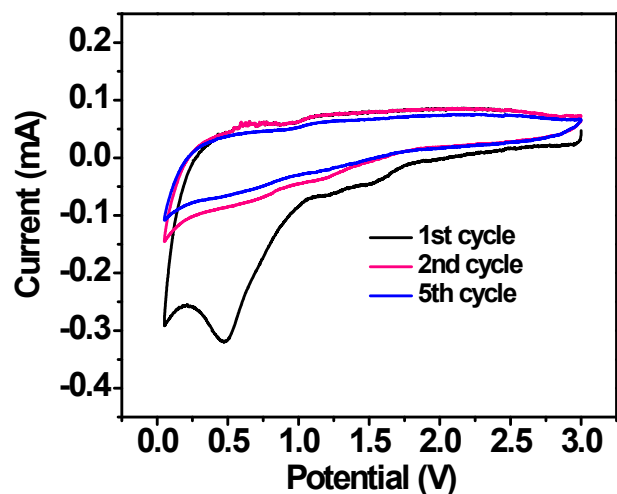

Figure S8. Representative cyclic voltammograms of ZIF-67 derived  $\text{Co}_3\text{O}_4$  at a scan rate of  $0.1 \text{ mV s}^{-1}$  between 0.01 and 3 V vs.  $\text{Li/Li}^+$ .

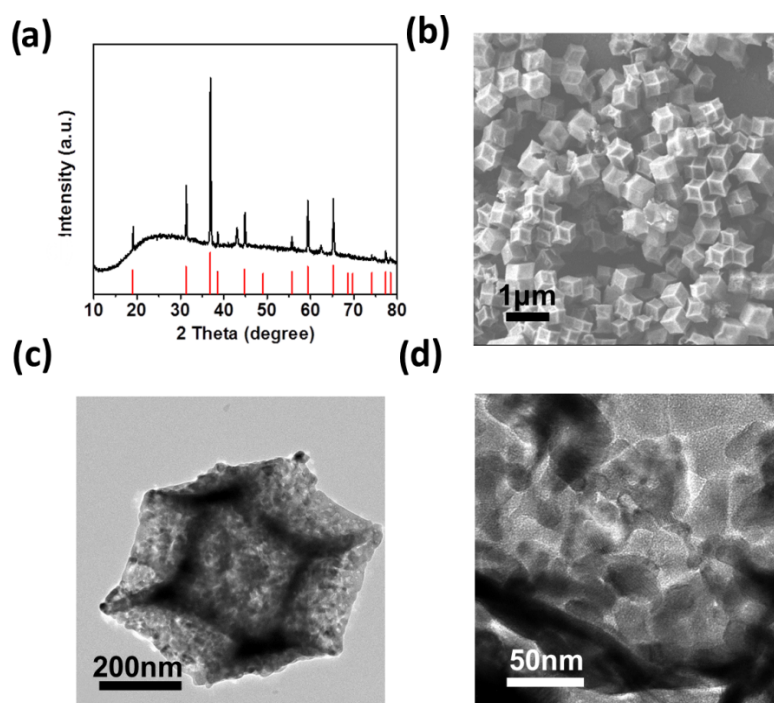

Figure S9. Characterization of  $\text{CO}_3\text{O}_4\text{-HD}$  obtained by directly calcinated ZIF-67 at air for 1h. (a) XRD pattern. (b) SEM image. (c,d) Low- and high-magnification TEM images.

**Figure S10.** Electrochemical impedance spectroscopy (EIS) of NiCo<sub>2</sub>O<sub>4</sub>/NiO-HD and Co<sub>3</sub>O<sub>4</sub>-HD electrodes.

**Table S1.** Comparison of electrochemical properties as the anode materials for LIBs between various cobalt-based materials and the as-synthesized porous NiCo<sub>2</sub>O<sub>4</sub>/NiO-HD in this work.

| Transition metal oxide                                                   | Specific capacity<br>(mAh g <sup>-1</sup> ) | Current density<br>(mA g <sup>-1</sup> ) | Cycle stability    | Reference    |
|--------------------------------------------------------------------------|---------------------------------------------|------------------------------------------|--------------------|--------------|
| Co <sub>3</sub> O <sub>4</sub> hollow polyhedron                         | ~1050                                       | 100                                      | 78% (100 cycles)   | 1            |
| ZnCo <sub>2</sub> O <sub>4</sub> microsphere                             | 975                                         | 60                                       | 98% (60 cycles)    | 2            |
| MnCo <sub>2</sub> O <sub>4</sub> microbox                                | 827                                         | 200                                      | 75.5% (50 cycles)  | 3            |
| NiCo <sub>2</sub> O <sub>4</sub> nanosheet/rGO                           | 1034                                        | 200                                      | 87.1% (50 cycles)  | 4            |
| CuCo <sub>2</sub> O <sub>4</sub> nanoparticle                            | 740                                         | 60                                       | 93.4% (50 cycles)  | 5            |
| CoMoO <sub>4</sub> nanoflower                                            | 1021                                        | 300                                      | 87.6% (100 cycles) | 6            |
| Co <sub>3</sub> O <sub>4</sub> /CoFe <sub>2</sub> O <sub>4</sub>         | 1354                                        | 65                                       | ~90% (60 cycles)   | 7            |
| Co <sub>3</sub> O <sub>4</sub> /Fe <sub>2</sub> O <sub>3</sub> nanowires | 1200                                        | 100                                      | 82% (60 cycles)    | 8            |
| ZnO/ZnCo <sub>2</sub> O <sub>4</sub> rod arrays                          | 978                                         | 45                                       | 92% (30 cycles)    | 9            |
| NiCo <sub>2</sub> O <sub>4</sub> /NiO hollow<br>dedocahedron             | 1535                                        | 200                                      | 97.3% (100 cycles) | Present work |

## References

- 1 R. Wu, X. Qian, X. Rui, H. Liu, B. Yadian, K. Zhou, J. Wei, Q. Yan, X. Q. Feng and Y. Long, *Small*, 2014, 10, 1932-1938.
- 2 Y. Sharma, N. Sharma, G. Subba Rao and B. Chowdari, *Adv. Funct. Mater.*, 2007, 17, 2855-2861.
- 3 L. Zhou, D. Zhao and X. W. Lou, *Adv. Mater.*, 2012, 24, 745-748.
- 4 G. Gao, H. B. Wu and X. W. D. Lou, *Advanced Energy Materials*, 2014.
- 5 Y. Sharma, N. Sharma, G. V. S. Rao and B. V. R. Chowdari, *J. Power Sources*, 2007, 173, 495-501.
- 6 H. Yu, C. Guan, X. Rui, B. Ouyang, B. Yadian, Y. Huang, H. Zhang, H. E. Hoster, H. J. Fan and Q. Yan, *Nanoscale*, 2014, 6, 10556-10561.
- 7 A. K. Rai, J. Gim, T. V. Thi, D. Ahn, S. J. Cho and J. Kim, *The Journal of Physical Chemistry C*, 2014, 118, 11234-11243.
- 8 H. Wu, M. Xu, Y. Wang and G. Zheng, *Nano Research*, 2013, 6, 167-173.
- 9 C. W. Lee, S.-D. Seo, D. W. Kim, S. Park, K. Jin, D.-W. Kim and K. S. Hong, *Nano Research*, 2013, 6, 348-355.
